# Supplementary material for: Nonsolvent-induced morphological changes and nanoporosity in poly(l-lactide) films
Source: Royal Society of Chemistry journal article supplement (doi:10.1039/c8sm00041g), 2018-01-01
Supplement: c8sm00041g1.pdf [file c8sm00041g1.pdf]

## Supporting Information

### Nonsolvent- Induced Morphological Changes and Nanoporosity in Poly(L-lactide) Films

P. Shaiju<sup>†,‡</sup> N. Sanjeeva Murthy<sup>§</sup> and E. Bhoje Gowd<sup>\*,†,‡</sup>

<sup>†</sup>Materials Science and Technology Division, CSIR-National Institute for Interdisciplinary Science and Technology, Trivandrum 695 019, Kerala, India.

<sup>‡</sup>Academy of Scientific and Innovative Research (AcSIR), New Delhi 110 001, India.

<sup>§</sup>New Jersey Center for Biomaterials, Rutgers University, The State University of New Jersey, Piscataway, NJ, USA.

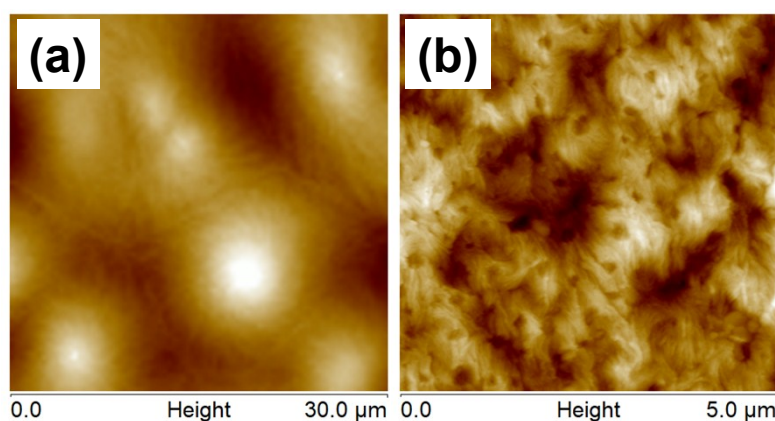

**Fig. S1.** AFM height image of PLLA film crystallized in (a) THF and (b) THF/water mixture.

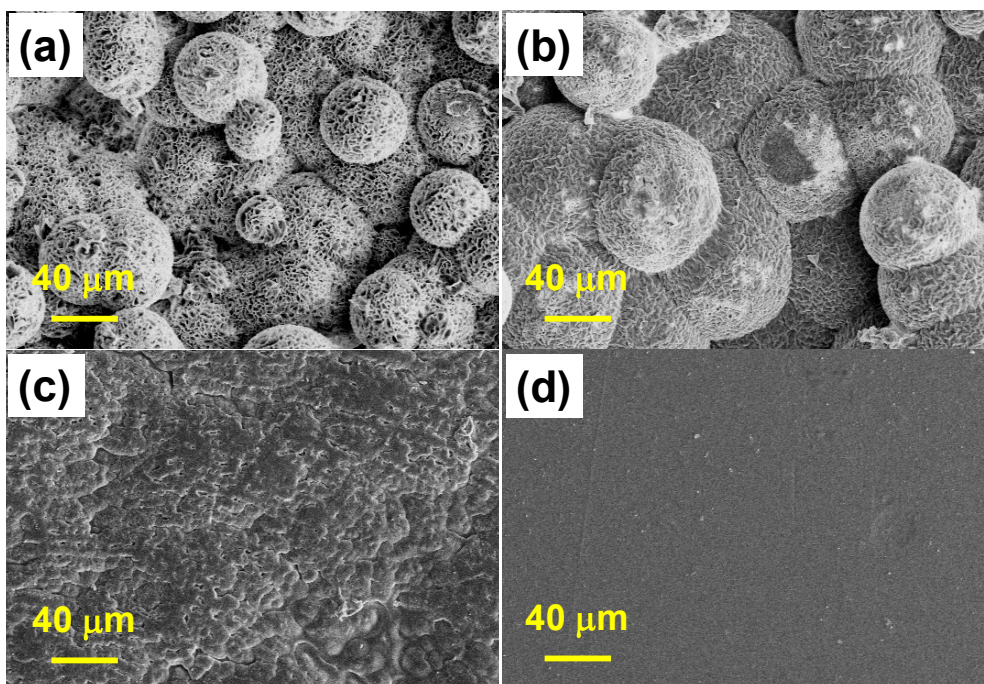

**Fig. S2.** SEM images of PLLA films crystallized in (a) THF, (b) acetone, (c) THF/water mixture, and (d) acetone/water mixture.

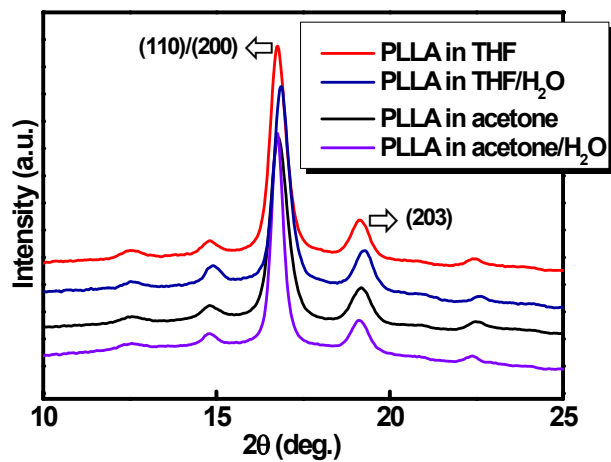

**Fig. S3.** WAXS patterns obtained for PLLA films crystallized in various solvents at 30 °C for three days.

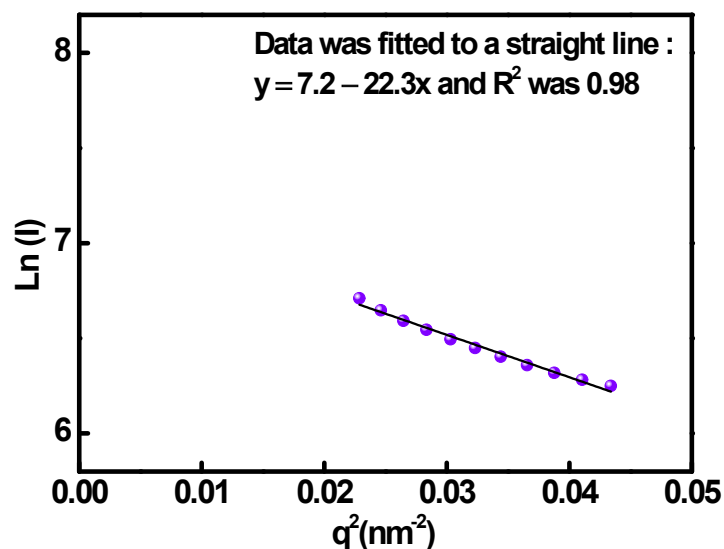

Fig. S4. Guinier plot of the scattering curve shown in Fig. 5a (PLLA film crystallized in acetone/water mixture).

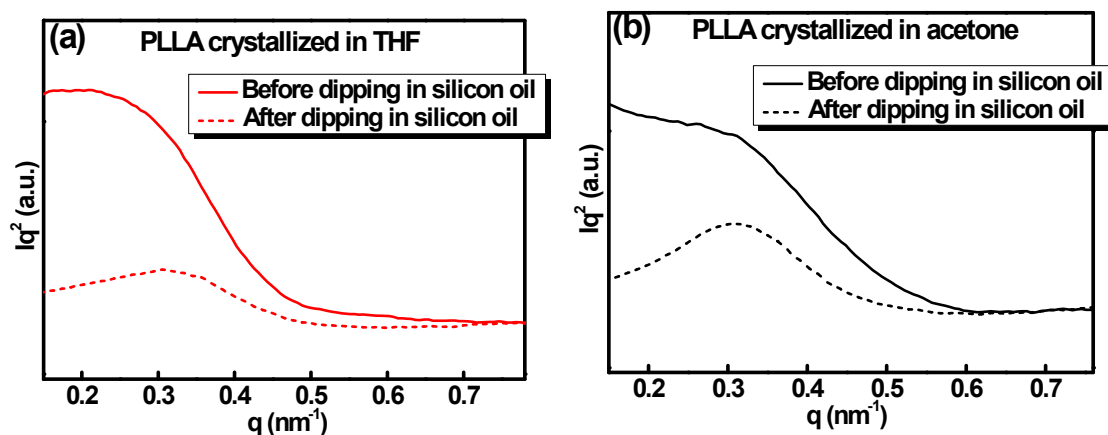

Fig. S5. Lorentz-corrected SAXS patterns of PLLA crystallized in THF and acetone.

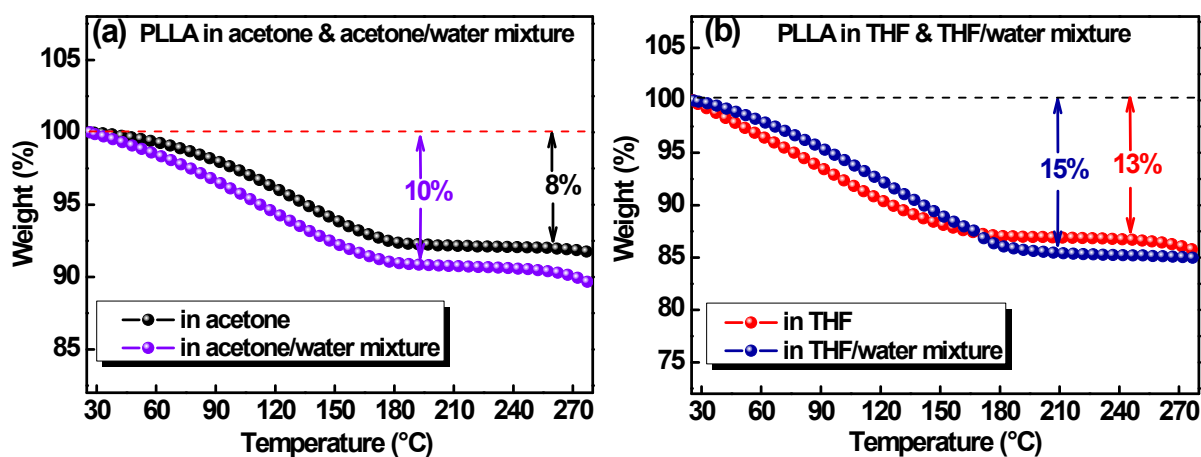

Fig. S6. TGA thermograms obtained for PLLA films crystallized in (a) acetone and acetone/water mixture and (b) THF and THF/water mixture.
